# Supplementary material for: Evaluating the role of paternal factors in aetiology and prognosis of recurrent pregnancy loss: study protocol for a hospital-based multicentre case–control study and cohort study (REMI III project)
Source: PubMed Central journal article supplement — BMJ Open. 2019 Nov 14;9(11):e033095. doi: 10.1136/bmjopen-2019-033095 (PMC6887057; doi:10.1136/bmjopen-2019-033095), 2019-11-14
Supplement: bmjopen-2019-033095.draft_revisions.pdf [file bmjopen-2019-033095.draft_revisions.pdf]

# BMJ Open

BMJ Open is committed to open peer review. As part of this commitment we make the peer review history of every article we publish publicly available.

When an article is published we post the peer reviewers' comments and the authors' responses online. We also post the versions of the paper that were used during peer review. These are the versions that the peer review comments apply to.

The versions of the paper that follow are the versions that were submitted during the peer review process. They are not the versions of record or the final published versions. They should not be cited or distributed as the published version of this manuscript.

BMJ Open is an open access journal and the full, final, typeset and author-corrected version of record of the manuscript is available on our site with no access controls, subscription charges or pay-per-view fees (<http://bmjopen.bmj.com>).

If you have any questions on BMJ Open's open peer review process please email [info.bmjopen@bmj.com](mailto:info.bmjopen@bmj.com)

# BMJ Open

## Evaluating the role of paternal factors in etiology and prognosis of recurrent pregnancy loss: study protocol for a multicenter case-control study and cohort study (the REMI III project)

|                               |                                                                                                                                                                                                                                                                                                                                                                                                                                                                                                                                                                                                                                                                                                                                                                              |
|-------------------------------|------------------------------------------------------------------------------------------------------------------------------------------------------------------------------------------------------------------------------------------------------------------------------------------------------------------------------------------------------------------------------------------------------------------------------------------------------------------------------------------------------------------------------------------------------------------------------------------------------------------------------------------------------------------------------------------------------------------------------------------------------------------------------|
| Journal:                      | <i>BMJ Open</i>                                                                                                                                                                                                                                                                                                                                                                                                                                                                                                                                                                                                                                                                                                                                                              |
| Manuscript ID                 | bmjopen-2019-033095                                                                                                                                                                                                                                                                                                                                                                                                                                                                                                                                                                                                                                                                                                                                                          |
| Article Type:                 | Protocol                                                                                                                                                                                                                                                                                                                                                                                                                                                                                                                                                                                                                                                                                                                                                                     |
| Date Submitted by the Author: | 19-Jul-2019                                                                                                                                                                                                                                                                                                                                                                                                                                                                                                                                                                                                                                                                                                                                                                  |
| Complete List of Authors:     | <p>du Fossé, Nadia; Leiden University Medical Center, Gynaecology and Obstetrics<br/> van der Hoorn, Marie-Louise; Leiden University Medical Center, Gynaecology and Obstetrics<br/> Eikmans, Michael; Leiden University Medical Center, Immunohematology and Blood Transfusion<br/> Heidt, Sebastiaan; Leiden University Medical Center, Immunohematology and Blood Transfusion<br/> le Cessie, S; Leiden University Medical Center, Clinical Epidemiology ; Leiden University Medical Center, Biomedical Data Sciences<br/> Mulders, Annemarie; Erasmus Medical Center, Gynaecology and Obstetrics<br/> van Lith, Jan; Leiden University Medical Center, Gynaecology and Obstetrics<br/> Lashley, Eileen; Leiden University Medical Center, Gynaecology and Obstetrics</p> |
| Keywords:                     | REPRODUCTIVE MEDICINE, EPIDEMIOLOGY, IMMUNOLOGY, PERINATOLOGY, Reproductive medicine < GYNAECOLOGY                                                                                                                                                                                                                                                                                                                                                                                                                                                                                                                                                                                                                                                                           |
|                               |                                                                                                                                                                                                                                                                                                                                                                                                                                                                                                                                                                                                                                                                                                                                                                              |

SCHOLARONE™  
Manuscripts

1  
2  
3  
4  
5  
6  
7  
8  
9  
10  
11  
12  
13  
14  
15  
16  
17  
18  
19  
20

## Evaluating the role of paternal factors in etiology and prognosis of recurrent pregnancy loss: study protocol for a multicenter case-control study and cohort study (the REMI III project)

### Authors and affiliations

Nadia A. du Fossé, MD<sup>1</sup>  
Marie-Louise P. van der Hoorn, MD, PhD<sup>1</sup>  
Michael Eikmans, PhD<sup>2</sup>  
Sebastiaan Heidt, PhD<sup>2</sup>  
Saskia le Cessie, PhD<sup>3,4</sup>  
Annemarie G.M.G.J. Mulders, MD, PhD<sup>5</sup>  
Jan M.M. van Lith, MD, PhD<sup>1</sup>  
Eileen E.L.O. Lashley, MD, PhD<sup>1</sup>

21  
22  
23  
24  
25  
26  
27  
28  
29  
30

<sup>1</sup> Department of Gynaecology and Obstetrics, Leiden University Medical Center, Leiden, the Netherlands

<sup>2</sup> Department of Immunohematology and Blood Transfusion, Leiden University Medical Center, Leiden, the Netherlands

<sup>3</sup> Department of Clinical Epidemiology, Leiden University Medical Center, Leiden, the Netherlands

<sup>4</sup> Department of Biomedical Data Sciences, Leiden University Medical Center, Leiden, the Netherlands

<sup>5</sup> Department of Gynaecology and Obstetrics, Erasmus MC, University Medical Center, Rotterdam, the Netherlands

### Corresponding author

31  
32  
33  
34  
35  
36  
37  
38  
39  
40  
41  
42  
43  
44  
45  
46  
47  
48  
49  
50  
51  
52  
53  
54  
55  
56  
57  
58  
59  
60

Nadia A. du Fossé  
Leiden University Medical Center, Department of Gynaecology and Obstetrics  
PO Box 9600 (location code: K6-76), 2300 RC Leiden, the Netherlands  
Tel : +31 715262896 Fax : +31 71526 6741  
[n.a.du\\_fosse@lumc.nl](mailto:n.a.du_fosse@lumc.nl)

Word count 299

Word count abstract 3540

## ABSTRACT

### Introduction

Recurrent pregnancy loss (RPL) is defined as the spontaneous demise of two or more pregnancies before the fetus reaches viability. Despite investigation of multiple known maternal causes, in more than 50% of couples this condition remains unexplained. Studies focusing on paternal factors in RPL are scarce and, therefore, paternal evaluation in RPL is currently very limited. However, regarding single miscarriage, there are multiple publications suggesting a contributive role of paternal factors. In the current project we aim to identify paternal factors associated with RPL and to improve couple-specific prediction of future pregnancy outcomes by developing a prediction model containing both maternal and paternal factors.

### Methods and analysis

In a case-control design the relation between unexplained RPL and paternal age, lifestyle factors, sperm DNA damage and immunomodulatory factors in peripheral blood and semen will be studied. Prospectively, 135 couples with naturally conceived unexplained RPL (cases) and 135 fertile couples without a history of pregnancy loss (controls) will be included, with collection of paternal blood and semen samples and documentation of clinical and lifestyle characteristics. In addition, 600 couples from both groups will be included retrospectively. To adjust for confounders, multivariate logistic regression will be used. The predictive value of paternal and maternal factors will be studied in the total RPL cohort consisting of approximately 735 couples. The primary outcome of the cohort study is live birth within five years after initial visit of the clinic. Secondary outcomes are ongoing pregnancy, time interval until next pregnancy and pregnancy complications.

### Ethics and dissemination

This project is approved by the Medical Research Ethics Committee of the Leiden University Medical Center. No risks or burden are expected from the study. The findings of this study will be disseminated via peer-reviewed publications and presentations at international conferences.

### Trial registration number

Netherlands Trial Register NL7762

### Keywords

REPRODUCTIVE MEDICINE, EPIDEMIOLOGY, IMMUNOLOGY, PERINATOLOGY, GYNAECOLOGY >  
Reproductive medicine

## ARTICLE SUMMARY

### Strengths and limitations of this study

- To the best of our knowledge, this is the first large multicenter prospective study to investigate the contribution of multiple paternal lifestyle and biological factors to the development of RPL.
- This project is a true combination of epidemiological and fundamental research directly linked to relevant clinical outcomes.
- The study will provide data to develop a prediction model for future pregnancy outcomes of RPL couples containing both maternal and paternal factors.
- The results of this study can possibly improve patient counseling and might also lead to new starting points for future treatment options with regard to lifestyle interventions.

- Observational studies on lifestyle factors are prone to response and recall bias, which is a potential limitation of this study.

## INTRODUCTION

Spontaneous miscarriage is the most common complication in human pregnancy, defined as the loss of conception before the fetus reaches viability (<24 weeks of gestation) and occurs in 10-15% of clinically recognized pregnancies.[1, 2] The recurrence of spontaneous miscarriage, internationally termed as recurrent pregnancy loss (RPL), is defined as two or more losses in one couple.[1] This condition affects approximately 1-3% of all couples of reproductive age.[3, 4]

RPL is a highly heterogeneous condition. Among the multifaceted causes are maternal antiphospholipid syndrome, structural uterine abnormalities, inherited thrombophilia, hyperhomocysteinaemia, thyroid antibodies and parental balanced chromosomal translocations.[5-14] Maternal age is a strong risk factor for miscarriages, mainly based on the increased prevalence of the fetal aneuploid abnormalities with advancing age.[15] Maternal lifestyle factors such as smoking, alcohol and caffeine consumption and adiposity are also associated with RPL.[16-21]

Despite extensive investigations, no underlying cause is identified in 50-70% of couples that present with RPL.[22, 23] Limited understanding of underlying pathophysiologic mechanisms means that options for effective interventions are lacking. Currently, no evidence-based therapeutic options are available for couples with unexplained RPL. Clinical management is either empirical or primarily focused on providing supportive care, which has been shown to have a beneficial effect.[24] Part of this supportive care is counseling on the prognosis and success rate of subsequent pregnancies in couples with RPL. Lund et al. evaluated the prognosis of 987 women with RPL and found that 67% achieved a live birth within 5 years after first consultation.[25] They showed that the chance of at least one subsequent live birth decreased significantly with increasing maternal age and cumulative number of preceding miscarriages. Other studies reported live birth rates ranging from 57-95%.[26-28] This large variation might be explained by the use of different definitions for recurrent miscarriages (2 vs. 3 losses, consecutive vs. non-consecutive, primary vs. secondary), by the degree of monitoring of the women and by in- or exclusion of biochemical pregnancies in the definition of RPL.[25] Nevertheless, these results demonstrate that although unidentified factors increasing the risk for miscarriage may exist, they do not necessarily prevent the development of a successful pregnancy. An essential part of the management of couples with RPL is to give trustworthy advice on the prognosis for a next pregnancy. However, the main limitation in current prognostic studies on unexplained RPL is the lack of adjustment for relevant risk factors, disabling the possibility of individual risk estimation.[25, 29]

The investigation of paternal contribution to RPL is currently limited to exploring the male karyotype. When considering counseling at an individual level, paternal factors may be included to establish a couple specified prognosis. Since the oocyte and the spermatozoon contribute equally to the genome of the embryo, it is biologically plausible to think that part of the idiopathic RPL cases could be explained by paternal factors. Some studies have evaluated the effect of paternal risk factors such as age, smoking and somatic health factors on the development of miscarriages, though these studies are mostly restricted to single miscarriage or to couples undergoing assisted reproductive techniques.[30-32] Following the absence of a consistent association between conventional semen parameters and RPL[33-40], the majority of recent studies addressing paternal factors and pregnancy losses focused on genetic defects, with sperm DNA fragmentation showing the most promising results. Both Robinson[41] and Zhao[42] showed in a meta-analysis that a high level of sperm DNA damage is associated with an increased miscarriage rate after in vitro fertilization/intracytoplasmic sperm injection (IVF/ICSI) treatment. Two other recent meta-analyses

1  
2  
3 found an increased mean difference in sperm DNA fragmentation of 12% in male partners of women  
4 with RPL compared to men whose partners had successful pregnancies.[43, 44] However,  
5 prospective studies in RPL couples evaluating the predictive value of sperm DNA fragmentation on  
6 future pregnancy outcomes are lacking.  
7

8  
9 In addition, imbalances in seminal immunomodulatory factors may contribute to the development  
10 of RPL. During pregnancy the maternal immune system has to tolerate the presence of semi-  
11 allogeneic cells in maternal tissue. Seminal fluid contains various signalling molecules that are  
12 thought to induce lymphocyte proliferation, affect natural killer cell activity and modify cytokine  
13 release from antigen presenting cells, resulting in tolerance towards paternal allo-antigens.[45-47]  
14 An optimal balance of pro-inflammatory and immunomodulatory factors seems to be necessary for  
15 the induction of immunologic tolerance and the process of implantation and placentation.[48]  
16 Seminal plasma levels of IL-18, IL-8 and IL-11 were found to be associated with fertilization and  
17 implantation.[49, 50] In subfertile couples with normospermia, including a small subgroup with a  
18 history of RPL, decreased concentrations of IL-1 $\beta$  and increased IFN- $\gamma$  were present in the seminal  
19 plasma.[51] The same study also suggests a correlation between levels of pro-inflammatory and anti-  
20 inflammatory cytokines in paternal peripheral blood and reproductive outcome. In case of such  
21 correlations, cytokine micropatterns in blood serum could serve as a proxy for those in the seminal  
22 plasma and could potentially be suitable as easily available prognostic markers in clinical practice.  
23 However, larger prospective studies are required to assess this.  
24  
25

26  
27 In this study we hypothesize that unexplained RPL is an issue stemming from both the female and  
28 the male. Our overall aims are to identify paternal factors that are associated with the development  
29 of this condition and to assess the predictive value of these factors for future reproductive outcomes  
30 in couples with RPL, in addition to maternal factors.  
31  
32

## 33 34 **STUDY OBJECTIVES**

### 35 36 **Primary objectives**

37 To identify paternal factors that are associated with unexplained RPL.

38 Paternal factors that will be assessed are: age, smoking, alcohol intake, recreational drugs intake,  
39 caffeine intake, body mass index (BMI), level of sperm DNA fragmentation and immunomodulatory  
40 factors in seminal plasma and paternal peripheral blood.  
41  
42

43 To assess the correlation between level of sperm DNA fragmentation and immunomodulatory  
44 factors in seminal plasma and paternal peripheral blood.  
45  
46

### 47 48 **Secondary objectives**

49 To assess the prognostic effect of paternal factors on reproductive outcomes in couples with  
50 unexplained RPL.  
51

52 To develop a prediction model containing both maternal and paternal factors to predict the chance  
53 of a successful pregnancy for couples with unexplained RPL.  
54  
55  
56  
57  
58  
59  
60

## METHODS AND ANALYSIS

### Study design

The primary objectives are focused on etiology and will be addressed in a case-control study. In this case-control study paternal factors are compared between couples with RPL and control couples. The expected duration of the case-control study is one year.

The secondary objectives will be addressed in a retrospective and prospective cohort study of couples with RPL. For all couples participating in the cohort study we aim to complete a follow-up on pregnancy outcomes of five years after first consultation.

A schematic overview of the study design is shown in Figure 1.

### Eligibility criteria

Inclusion criteria for RPL couples are:

- Unexplained RPL  
According to the ESHRE Recurrent Pregnancy Loss Guideline[1] defined as the loss of  $\geq 2$  pregnancies in the current relationship, without any known cause for RPL. Known causes are parenteral chromosomal abnormalities, uterine abnormalities, acquired or hereditary thrombophilia, instable endocrine diseases such as hypothyroidism or diabetes and hyperhomocysteinaemia. Pregnancy loss includes all pregnancy losses before 24<sup>th</sup> week of gestation verified by ultrasonography or uterine curettage and histology and also non-visualized pregnancies (including biochemical pregnancy loss and/or resolved and treated pregnancies of unknown location) verified by positive urine or serum hCG. Pregnancy losses do not need to be consecutive.

Exclusion criteria for RPL couples are:

- Known causes for RPL;
- Mental or legal incapability of either the male or female;
- Pregnancy after assisted reproductive techniques (ART);
- Pregnancy after oocyte, embryo or spermatozoa donation;
- Loss of  $< 2$  pregnancies in the current relationship.

Inclusion criteria for control couples are:

- Proven fertility (i.e. pregnant at the time of inclusion or previously experienced pregnancy in the same relationship)

Exclusion criteria for control couples are:

- Previous spontaneous miscarriage(s);
- One of the following conditions: parental chromosomal abnormalities, uterine abnormalities, acquired or hereditary thrombophilia, instable endocrine diseases such as hypothyroidism or diabetes and hyperhomocysteinaemia (this will not be investigated, however, couples are excluded when it is known);
- Mental or legal incapability of either the male or female;
- Pregnancy after ART;
- Pregnancy after oocyte, embryo or spermatozoa donation.

### Study population and recruitment

Couples with RPL that visit the recurrent miscarriage outpatient clinic of Leiden University Medical Center (LUMC) or Early Pregnancy Unit (EPU) of Erasmus MC University Medical Center (Erasmus

MC) will be assessed for eligibility. LUMC is the coordinating center. Couples with RPL will be invited to participate at their intake visit (after they have been referred by their general practitioner or a referring hospital). After diagnostic investigations on known causes of RPL are completed, couples with unexplained RPL will be selected for inclusion. In addition, couples that visited the participating clinics in the period 2012-2019 will be included in retrospect. Couples with RPL will participate in both the case-control study and the cohort study.

Eligible couples visiting the antenatal outpatient clinic of LUMC during their pregnancy will be invited to participate in the control group. Control couples will also be included in retrospect.

Study recruitment in the coordinating center started in June 2019. Recruitment at Erasmus MC is expected to start in September 2019. All couples will receive written information about the study together with the informed consent form, which includes a request to obtain permission for gathering data from medical records and storage of biomaterial for additional analyses related to this study. Participants are informed that study participation is voluntary and that they are free to withdraw at any time without any consequences for subsequent care. In case of participation, the informed consent form should be signed prior to inclusion in the study.

## Study procedures

### *Collection of clinical characteristics*

Data about obstetric and general medical history and lifestyle factors of all participating couples will be documented (Table 1).

#### *Parameters*

|                                                                       |                                                                                                                                                                                                                                                                                                                                                                                                                                                                                                                                                                                                                              |
|-----------------------------------------------------------------------|------------------------------------------------------------------------------------------------------------------------------------------------------------------------------------------------------------------------------------------------------------------------------------------------------------------------------------------------------------------------------------------------------------------------------------------------------------------------------------------------------------------------------------------------------------------------------------------------------------------------------|
| <b><i>Maternal characteristics</i></b>                                | Date of birth, zip code, ethnicity, level of education, profession, body weight, height, general medical history, use of medication, family history, detailed obstetric history (parity, number of spontaneous miscarriages, ectopic pregnancies or induced abortions, modes of conception of previous births, modes of delivery of previous births, gestational age at previous births, complications during previous pregnancies and deliveries, birth weight, gender and Apgar score of children of previous births), lifestyle characteristics (smoking, alcohol, drugs and caffeine intake, physical exercise pattern). |
| <b><i>Paternal characteristics</i></b>                                | Date of birth, zip code, ethnicity, level of education, profession, body weight, height, general medical history, use of medication, family history, lifestyle characteristics (smoking, alcohol, drugs and caffeine intake, physical exercise pattern).                                                                                                                                                                                                                                                                                                                                                                     |
| <b><i>Results of (previous) investigations into causes of RPL</i></b> | Presence of thrombophilia (factor V Leiden mutation, prothrombin gene mutation, protein C deficiency, protein S deficiency, high factor VIII, antithrombin deficiency) presence of antiphospholipid syndrome (anticardiolipin IgG and IgM, B2 glycoprotein I antibodies IgG and IgM, and lupus anticoagulans), hyperhomocysteinaemia, parenteral chromosomal abnormalities, presence of thyroid antibodies, presence of uterine anomalies.                                                                                                                                                                                   |

**Table 1. Collection of data**

These data will be collected during consultations and from medical records. Additional required data will be acquired via digital surveys that will be sent to participating couples. Data entry and generation of digital surveys will be performed using Castor EDC.[52]



Couples with RPL participating in the cohort study will be in follow-up for a total time of five years after initial consultation. These couples will receive a digital survey once a year. This survey contains questions about outcomes of new pregnancies if applicable and changes in medical history and lifestyle in the past year. When couples with RPL are still in regular clinical follow-up, data will be collected during regular consultations and it will not be necessary to send a digital survey.

Clinical characteristics of couples participating in the control group will be collected at one time point (during consultation at the antenatal clinic), directly followed by a digital survey containing questions about lifestyle related to the period prior to the index pregnancy. There is no follow-up of control couples.

### *Collection and analysis of samples*

Male partners of participating couples will be asked for a peripheral blood sample and sperm sample acquired through masturbation. Samples will be collected from prospectively included men only (from retrospectively included couples only clinical data will be documented). All samples will be processed and analyzed in the laboratory of Reproductive Immunology at LUMC. Samples will be collected once. Samples from other participating centers will be sent to LUMC for storage and analysis.

Semen samples will be stored in  $-20^{\circ}\text{C}$  until time of analysis. Sperm DNA fragmentation will be detected by terminal deoxynucleotidyltransferase dUTP nick end labeling (TUNEL) assay (APO-DIRECT™ Kit, BD Biosciences) following the manufacturer's instructions. The level (%) of sperm DNA fragmentation will be determined by flow cytometric analysis.

The level of immunomodulatory factors in seminal plasma and peripheral blood will be assessed by Bio-Plex Luminex™ system assay (Bio-Rad Laboratories) following the manufacturer's instructions. Samples will be analysed using a Bio-Plex™ Array Reader with Bio-Plex software. Through this assay quantification of cytokine levels including TNF- $\alpha$ , IFN- $\gamma$ , TGF- $\beta$ 1, IL-1 $\beta$ , IL-8, IL-10, IL-11, IL-18, sHLA-G and PGE2 will be performed.[49-51, 53]

### **Control of bias**

Since the design of this study is observational, there is need to control and adjust for confounding factors. To control for confounders, stratification and regression models will be used. Selection bias is minimized by a clear definition of the study population. In addition, the control couples are selected independently of their exposure and they represent the source population that generates the cases. Finally, information bias is limited as much as possible by collecting information similarly from the cases and controls.

### **Sample size calculation**

#### *Case-control study*

Since sperm DNA fragmentation could be seen as a proxy for advanced age and also for the presence of smoking, obesity and excessive exercise, this factor was used for sample size calculations. Zhao et al.[42] evaluated the association between sperm DNA fragmentation and miscarriages after IVF/ICSI treatment in 2756 couples and they found a combined odds ratio of 2.28 (95% CI 1.55-3.35) for miscarriage in patients with high sperm DNA fragmentation. The rate of high sperm DNA fragmentation was significantly higher in the group with miscarriage (34%) compared to the group with live births (19%). To detect this difference, using  $\alpha = 0.05$  and power = 80%, the sample size would be 135 in the RPL group and 135 in the control group.

### *Cohort-study*

No straightforward accepted methods exist to estimate the required number of subjects to develop a multivariable prediction model. Ideally, prognostic studies include several hundreds of patients who develop the outcome event.[54] Various studies have suggested that for each candidate predictor studied, at least 10 events are required.[55, 56] Currently, female age and number of previous pregnancy losses are the only known factors consistently shown to impact prognosis for future pregnancy outcomes.[1] In addition to these factors, we intend to examine paternal factors for their predictive capacity. Assuming that at least two paternal factors will be included in the model, like age and BMI (and also maternal BMI), with four age categories (<30, 30-35, 35-40, >40 years), four categories for preceding miscarriages (2, 3, 4, ≥5) and four BMI categories (<18, 18-25, 25-30, >30 kg/m<sup>2</sup>), a minimum of 20 x 10 = 200 patients with RPL and live birth in subsequent pregnancy are necessary. We estimate that the total RPL cohort will eventually consist of approximately 735 couples (with retrospective and prospective inclusions together, shown in Figure 1) and we expect 70% of them to have a live birth within five years after initial consultation. Based on these numbers, it is feasible to develop a multivariable model to predict the chances for ongoing pregnancy and live birth within five years. We will include patients who visited the clinics between 2012-2019 and also the couples (cases) of the case-control study.

### **Study outcomes**

In the case-control study the following exposures will be studied:

- Smoking: documented as average number of cigarettes per day. Also data on former smoking behavior will be documented;
- Alcohol consumption: documented as average number of units per week;
- Recreational drug consumption: specified by type of drug, quantity and frequency;
- Caffeine intake: documented as average number of caffeinated drinks per day;
- Physical exercise pattern; documented as moderate to intensive physical exercise in days per week and minutes per day.

In the cohort study the following outcomes will be studied:

- Live birth within five years after initial consultation (for this outcome we intend to develop a prediction model);
- Ongoing pregnancy (>24 weeks);
- Time interval until next pregnancy;
- Pregnancy complications including fetal growth restriction, preterm birth, pregnancy induced hypertension (PIH), preeclampsia, Hemolysis Elevated Liver enzymes and Low Platelets (HELLP) syndrome and gestational diabetes mellitus.

### **Statistical analysis plan**

For the case-control study, proportions will be calculated for the dichotomous and categorical exposures with 95% confidence intervals. Comparison between the cases and controls is performed by a Chi square test. Mean differences with 95% confidence intervals are calculated to compare continuous variables between the groups. To correct for confounders (including maternal factors), multivariate logistic regression will be used.

To indicate a relation between live birth and paternal factors as described above, first univariate logistic regression will be used. To select the most prognostic set of variables logistic regression with shrinkage methods such as lasso will be used. Time to pregnancy is estimated using the Kaplan Meier method. To cope with analysis of missing values, multiple imputation will be performed. Statistical analysis will be performed using SPSS Statistics 25 (IBM SPSS Software) and/or R version

1  
2  
3 3.6.0. For all tests a two sided  $p < 0.05$  or 95% confidence interval not including the null value is  
4 considered significant.  
5  
6

## 7 **PATIENT AND PUBLIC INVOLVEMENT**

8  
9 During the development of the study protocol the Dutch association for patients with fertility  
10 problems (Freya) was consulted. Results will be presented during their thematic meetings to inform  
11 patients about study progress. Social media will be used to highlight new publications and  
12 conference presentations.  
13  
14

## 15 **ETHICS AND DISSEMINATION**

16  
17 This study will be conducted according to the principles of the Declaration of Helsinki.[57] Ethics  
18 approval for this study was obtained at the Medical Research Ethics Committee of the Leiden  
19 University Medical Center. No risks or burden are expected from the study. No additional hospital  
20 visits are required.  
21  
22

23  
24 Eligible couples obtain written information about the study objectives and procedures and they will  
25 have sufficient time to decide on participating. All clinical data and data derived from surveys will be  
26 saved in the Castor EDC REMI III database. No data directly traceable to patients will be included in  
27 this database. Every couple will be assigned a unique code. This code will also be used to associate  
28 clinical data with corresponding blood and semen samples.  
29

30 The findings of this study will be disseminated via peer-reviewed publications and presentations at  
31 international conferences.  
32  
33

## 34 **DISCUSSION**

35  
36 RPL is often accompanied by psychological morbidities such as depression and anxiety, making it a  
37 very distressing and costly condition.[58] In current practice RPL is mostly considered an issue  
38 derived exclusively from female causes. However, it is questionable whether this female-centered  
39 approach is correct, especially considering the substantial proportion of RPL cases that remains  
40 unexplained. In November 2017 the European Society of Human Reproduction and Embryology  
41 (ESHRE) developed a new guideline for the management of RPL, to supply healthcare providers with  
42 the best available evidence for investigation and treatment of RPL. Future research on the paternal  
43 contribution in RPL, such as the impact of paternal lifestyle factors and sperm DNA damage, was  
44 recommended by the Guideline committee.[1]  
45  
46

47  
48 In this project we hypothesize that besides maternal factors, paternal factors are associated with the  
49 development of RPL. Understanding the role of these factors contributing to the pathological  
50 mechanisms of RPL may provide new diagnostic tools and treatment options. To the best of our  
51 knowledge, this project includes the first large prospective cohort study evaluating the contribution  
52 of multiple paternal lifestyle and biological factors to unexplained RPL.  
53

54  
55 Limitations of all research on lifestyle factors using self-reported data are the phenomena of recall  
56 and response bias. Individuals might report biased estimates of self-assessed behaviour for different  
57 reasons, including misunderstanding or social-desirability. Although these types of bias will always  
58 be present to some extent, we try to minimize this by using standardized and well-structured  
59  
60

1  
2  
3 surveys, by avoiding long recall periods as much as possible and by choosing an appropriate and  
4 well-defined control group.  
5

6  
7 Ultimately, we aim to develop a couple-specific model including both maternal and paternal factors  
8 to predict future reproductive outcomes in couples with unexplained RPL. Although not an  
9 intervention as such, counseling couples confronted with RPL about their individual prognosis is an  
10 essential part of the management of these couples and allows them to decide for or against future  
11 pregnancy attempts. Moreover, this study might also provide new starting points for future  
12 treatment options with regard to lifestyle interventions.  
13  
14  
15  
16  
17  
18  
19  
20  
21  
22  
23  
24  
25  
26  
27  
28  
29  
30  
31  
32  
33  
34  
35  
36  
37  
38  
39  
40  
41  
42  
43  
44  
45  
46  
47  
48  
49  
50  
51  
52  
53  
54  
55  
56  
57  
58  
59  
60

For peer review only

## FULL REFERENCES

1. ESHRE EPGDG. Recurrent Pregnancy Loss. *Guideline of the European Society of Human Reproduction and Embryology* 2017.
2. Nybo Andersen AM, Wohlfahrt J, Christens P, et al. Maternal age and fetal loss: population based register linkage study. *Bmj* 2000;320:1708-12.
3. Rai R, Regan L. Recurrent miscarriage. *Lancet* 2006;368:601-11.
4. Jauniaux E, Farquharson RG, Christiansen OB, et al. Evidence-based guidelines for the investigation and medical treatment of recurrent miscarriage. *Hum Reprod* 2006;21:2216-22.
5. Hook EB, Healy NP, Willey AM. How much difference does chromosome banding make? Adjustments in prevalence and mutation rates of human structural cytogenetic abnormalities. *Ann Hum Genet* 1989;53:237-42.
6. De Braekeleer M, Dao TN. Cytogenetic studies in couples experiencing repeated pregnancy losses. *Hum Reprod* 1990;5:519-28.
7. Miyakis S, Lockshin MD, Atsumi T, et al. International consensus statement on an update of the classification criteria for definite antiphospholipid syndrome (APS). *J Thromb Haemost* 2006;4:295-306.
8. Sanson BJ, Friederich PW, Simioni P, et al. The risk of abortion and stillbirth in antithrombin-, protein C-, and protein S-deficient women. *Thromb Haemost* 1996;75:387-8.
9. Rey E, Kahn SR, David M, et al. Thrombophilic disorders and fetal loss: a meta-analysis. *Lancet* 2003;361:901-8.
10. Steegers-Theunissen RP, Boers GH, Blom HJ, et al. Hyperhomocysteinaemia and recurrent spontaneous abortion or abruptio placentae. *Lancet* 1992;339:1122-3.
11. Wouters MG, Boers GH, Blom HJ, et al. Hyperhomocysteinemia: a risk factor in women with unexplained recurrent early pregnancy loss. *Fertil Steril* 1993;60:820-5.
12. van den Boogaard E, Cohn DM, Korevaar JC, et al. Number and sequence of preceding miscarriages and maternal age for the prediction of antiphospholipid syndrome in women with recurrent miscarriage. *Fertil Steril* 2013;99:188-92.
13. Salim R, Woelfer B, Backos M, et al. Reproducibility of three-dimensional ultrasound diagnosis of congenital uterine anomalies. *Ultrasound Obstet Gynecol* 2003;21:578-82.
14. Woelfer B, Salim R, Banerjee S, et al. Reproductive outcomes in women with congenital uterine anomalies detected by three-dimensional ultrasound screening. *Obstet Gynecol* 2001;98:1099-103.
15. Goddijn M, Leschot NJ. Genetic aspects of miscarriage. *Baillieres Best Pract Res Clin Obstet Gynaecol* 2000;14:855-65.
16. Gardella JR, Hill JA, 3rd. Environmental toxins associated with recurrent pregnancy loss. *Semin Reprod Med* 2000;18:407-24.
17. Christiansen OB, Nybo Andersen AM, Bosch E, et al. Evidence-based investigations and treatments of recurrent pregnancy loss. *Fertil Steril* 2005;83:821-39.
18. George L, Granath F, Johansson AL, et al. Risks of repeated miscarriage. *Paediatr Perinat Epidemiol* 2006;20:119-26.
19. Lashen H, Fear K, Sturdee DW. Obesity is associated with increased risk of first trimester and recurrent miscarriage: matched case-control study. *Hum Reprod* 2004;19:1644-6.
20. Cnattingius S, Signorello LB, Anneren G, et al. Caffeine intake and the risk of first-trimester spontaneous abortion. *N Engl J Med* 2000;343:1839-45.
21. George L, Granath F, Johansson AL, et al. Environmental tobacco smoke and risk of spontaneous abortion. *Epidemiology* 2006;17:500-5.
22. Stephenson MD. Frequency of factors associated with habitual abortion in 197 couples. *Fertil Steril* 1996;66:24-9.
23. Jaslow CR, Carney JL, Kutteh WH. Diagnostic factors identified in 1020 women with two versus three or more recurrent pregnancy losses. *Fertil Steril* 2010;93:1234-43.

- 1
- 2
- 3
- 4 24. Liddell HS, Pattison NS, Zanderigo A. Recurrent miscarriage--outcome after supportive care
- 5 in early pregnancy. *Aust N Z J Obstet Gynaecol* 1991;31:320-2.
- 6 25. Lund M, Kamper-Jorgensen M, Nielsen HS, et al. Prognosis for live birth in women with
- 7 recurrent miscarriage: what is the best measure of success? *Obstet Gynecol* 2012;119:37-43.
- 8 26. Kaandorp SP, Goddijn M, van der Post JA, et al. Aspirin plus heparin or aspirin alone in
- 9 women with recurrent miscarriage. *N Engl J Med* 2010;362:1586-96.
- 10 27. Badawy AM, Khiary M, Sherif LS, et al. Low-molecular weight heparin in patients with
- 11 recurrent early miscarriages of unknown aetiology. *J Obstet Gynaecol* 2008;28:280-4.
- 12 28. Fawzy M, Shokeir T, El-Tatongy M, et al. Treatment options and pregnancy outcome in
- 13 women with idiopathic recurrent miscarriage: a randomized placebo-controlled study. *Arch Gynecol*
- 14 *Obstet* 2008;278:33-8.
- 15 29. Sugiura-Ogasawara M, Ozaki Y, Kitaori T, et al. Live birth rate according to maternal age and
- 16 previous number of recurrent miscarriages. *Am J Reprod Immunol* 2009;62:314-9.
- 17 30. de la Rochebrochard E, Thonneau P. Paternal age and maternal age are risk factors for
- 18 miscarriage; results of a multicentre European study. *Hum Reprod* 2002;17:1649-56.
- 19 31. Venners SA, Wang X, Chen C, et al. Paternal smoking and pregnancy loss: a prospective study
- 20 using a biomarker of pregnancy. *Am J Epidemiol* 2004;159:993-1001.
- 21 32. Colaci DS, Afeiche M, Gaskins AJ, et al. Men's body mass index in relation to embryo quality
- 22 and clinical outcomes in couples undergoing in vitro fertilization. *Fertil Steril* 2012;98:1193-9.e1.
- 23 33. Sbracia S, Cozza G, Grasso JA, et al. Semen parameters and sperm morphology in men in
- 24 unexplained recurrent spontaneous abortion, before and during a 3 year follow-up period. *Hum*
- 25 *Reprod* 1996;11:117-20.
- 26 34. Gopalkrishnan K, Padwal V, Meherji PK, et al. Poor quality of sperm as it affects repeated
- 27 early pregnancy loss. *Arch Androl* 2000;45:111-7.
- 28 35. Bhattacharya SM. Association of various sperm parameters with unexplained repeated early
- 29 pregnancy loss--which is most important? *Int Urol Nephrol* 2008;40:391-5.
- 30 36. Brahem S, Mehdi M, Landolsi H, et al. Semen parameters and sperm DNA fragmentation as
- 31 causes of recurrent pregnancy loss. *Urology* 2011;78:792-6.
- 32 37. Imam SN, Shamsi MB, Kumar K, et al. Idiopathic recurrent pregnancy loss: role of paternal
- 33 factors; a pilot study. *J Reprod Infertil* 2011;12:267-76.
- 34 38. Talebi AR, Vahidi S, Aflatoonian A, et al. Cytochemical evaluation of sperm chromatin and
- 35 DNA integrity in couples with unexplained recurrent spontaneous abortions. *Andrologia* 2012;44
- 36 Suppl 1:462-70.
- 37 39. Khadem N, Poorhoseyni A, Jalali M, et al. Sperm DNA fragmentation in couples with
- 38 unexplained recurrent spontaneous abortions. *Andrologia* 2014;46:126-30.
- 39 40. Zhang L, Wang L, Zhang X, et al. Sperm chromatin integrity may predict future fertility for
- 40 unexplained recurrent spontaneous abortion patients. *Int J Androl* 2012;35:752-7.
- 41 41. Robinson L, Gallos ID, Conner SJ, et al. The effect of sperm DNA fragmentation on
- 42 miscarriage rates: a systematic review and meta-analysis. *Hum Reprod* 2012;27:2908-17.
- 43 42. Zhao J, Zhang Q, Wang Y, et al. Whether sperm deoxyribonucleic acid fragmentation has an
- 44 effect on pregnancy and miscarriage after in vitro fertilization/intracytoplasmic sperm injection: a
- 45 systematic review and meta-analysis. *Fertil Steril* 2014;102:998-1005.e8.
- 46 43. Tan J, Taskin O, Albert A, et al. Association between sperm DNA fragmentation and
- 47 idiopathic recurrent pregnancy loss: a systematic review and meta-analysis. *Reprod Biomed Online*
- 48 2018.
- 49 44. McQueen DB, Zhang J, Robins JC. Sperm DNA fragmentation and recurrent pregnancy loss: a
- 50 systematic review and meta-analysis. *Fertil Steril* 2019.
- 51 45. Moldenhauer LM, Diener KR, Thring DM, et al. Cross-presentation of male seminal fluid
- 52 antigens elicits T cell activation to initiate the female immune response to pregnancy. *J Immunol*
- 53 2009;182:8080-93.
- 54
- 55
- 56
- 57
- 58
- 59
- 60



- 1  
2  
3 46. Robertson SA. Seminal plasma and male factor signalling in the female reproductive tract. *Cell Tissue Res* 2005;322:43-52.
- 4  
5 47. Meuleman T, Snaterse G, van Beelen E, et al. The immunomodulating effect of seminal  
6 plasma on T cells. *J Reprod Immunol* 2015;110:109-16.
- 7  
8 48. Nederlof I, Meuleman T, van der Hoorn MLP, et al. The seed to success: The role of seminal  
9 plasma in pregnancy. *J Reprod Immunol* 2017;123:24-8.
- 10  
11 49. Nikolaeva MA, Babayan AA, Stepanova EO, et al. The relationship of seminal transforming  
12 growth factor-beta1 and interleukin-18 with reproductive success in women exposed to seminal  
13 plasma during IVF/ICSI treatment. *J Reprod Immunol* 2016;117:45-51.
- 14  
15 50. Seshadri S, Bates M, Vince G, et al. Cytokine expression in the seminal plasma and its effects  
16 on fertilisation rates in an IVF cycle. *Andrologia* 2011;43:378-86.
- 17  
18 51. Havrylyuk A, Chopryak V, Boyko Y, et al. Cytokines in the blood and semen of infertile  
19 patients. *Cent Eur J Immunol* 2015;40:337-44.
- 20  
21 52. Ciwit BV. Castor Electronic Data Capture [Internet]. 2018.
- 22  
23 53. Larsen MH, Bzorek M, Pass MB, et al. Human leukocyte antigen-G in the male reproductive  
24 system and in seminal plasma. *Mol Hum Reprod* 2011;17:727-38.
- 25  
26 54. Moons KG, Royston P, Vergouwe Y, et al. Prognosis and prognostic research: what, why, and  
27 how? *Bmj* 2009;338:b375.
- 28  
29 55. Laupacis A, Sekar N, Stiell IG. Clinical prediction rules. A review and suggested modifications  
30 of methodological standards. *Jama* 1997;277:488-94.
- 31  
32 56. Harrell FE, Jr., Lee KL, Mark DB. Multivariable prognostic models: issues in developing  
33 models, evaluating assumptions and adequacy, and measuring and reducing errors. *Stat Med*  
34 1996;15:361-87.
- 35  
36 57. World Medical Association Declaration of Helsinki: ethical principles for medical research  
37 involving human subjects. *Jama* 2013;310:2191-4.
- 38  
39 58. Serrano F, Lima ML. Recurrent miscarriage: psychological and relational consequences for  
40 couples. *Psychol Psychother* 2006;79:585-94.
- 41  
42  
43  
44  
45  
46  
47  
48  
49  
50  
51  
52  
53  
54  
55  
56  
57  
58  
59  
60

## AUTHOR'S CONTRIBUTIONS

ELOL and MLPVDH drafted the protocol and then NADF wrote the protocol in accordance with the co-authors' contributions. All authors contributed to the writing and reviewing of this article; ME and SH complemented on the immunological questions in the protocol and SLC improved the methodological aspects. All authors gave final approval of the version to be published.

## COMPETING INTERESTS STATEMENT

None declared.

## FUNDING STATEMENT

This project has funding from the Leiden University research profile 'Innovation in Health Strategy and Quality of Care'.

## LICENSE STATEMENT

I, the Submitting Author has the right to grant and does grant on behalf of all authors of the Work (as defined in the below author licence), an exclusive licence and/or a non-exclusive licence for contributions from authors who are: i) UK Crown employees; ii) where BMJ has agreed a CC-BY licence shall apply, and/or iii) in accordance with the terms applicable for US Federal Government officers or employees acting as part of their official duties; on a worldwide, perpetual, irrevocable, royalty-free basis to BMJ Publishing Group Ltd ("BMJ") its licensees and where the relevant Journal is co-owned by BMJ to the co-owners of the Journal, to publish the Work in BMJ Open and any other BMJ products and to exploit all rights, as set out in our license statement.



## TABLE AND FIGURE LEGENDS

### Figure 1. Schematic diagram of study design

For the case-control study the target for inclusion is 735 couples in each arm. Of these 735 couples, 600 will be included retrospectively (2012-2018) and 135 will be included prospectively (2019-2020). Semen and blood will be collected from prospectively included men only.

Couples with RPL (cases) are also part of a cohort study. We aim to complete a five year follow-up of these couples, starting from their individual point of inclusion. Control couples will not be in follow-up.

For peer review only

1  
2  
3  
4  
5  
6  
7  
8  
9  
10  
11  
12  
13  
14  
15  
16  
17  
18  
19  
20  
21  
22  
23  
24  
25  
26  
27  
28  
29  
30  
31  
32  
33  
34  
35  
36  
37  
38  
39  
40  
41  
42  
43  
44  
45  
46  
47  
48  
49  
50  
51  
52  
53  
54  
55  
56  
57  
58  
59  
60

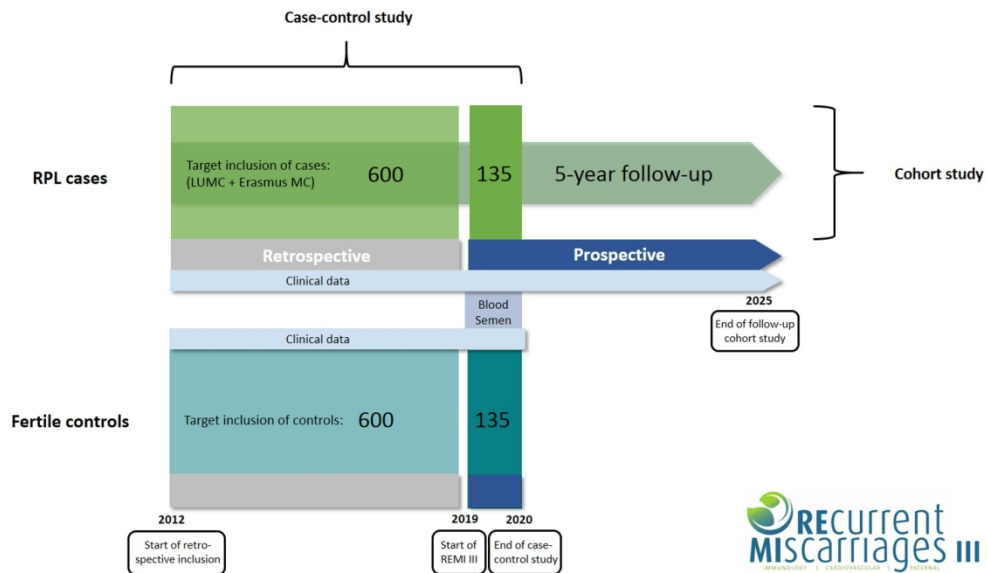

Figure 1. Schematic diagram of study design  
 For the case-control study the target for inclusion is 735 couples in each arm. Of these 735 couples, 600 will be included retrospectively (2012-2018) and 135 will be included prospectively (2019-2020). Semen and blood will be collected from prospectively included men only.  
 Couples with RPL (cases) are also part of a cohort study. We aim to complete a five year follow-up of these couples, starting from their individual point of inclusion. Control couples will not be in follow-up.

166x96mm (300 x 300 DPI)

# BMJ Open

## Evaluating the role of paternal factors in etiology and prognosis of recurrent pregnancy loss: study protocol for a hospital-based multicentre case-control study and cohort study (REMI III project)

|                                 |                                                                                                                                                                                                                                                                                                                                                                                                                                                                                                                                                                                                                                                                                                                                                         |
|---------------------------------|---------------------------------------------------------------------------------------------------------------------------------------------------------------------------------------------------------------------------------------------------------------------------------------------------------------------------------------------------------------------------------------------------------------------------------------------------------------------------------------------------------------------------------------------------------------------------------------------------------------------------------------------------------------------------------------------------------------------------------------------------------|
| Journal:                        | <i>BMJ Open</i>                                                                                                                                                                                                                                                                                                                                                                                                                                                                                                                                                                                                                                                                                                                                         |
| Manuscript ID                   | bmjopen-2019-033095.R1                                                                                                                                                                                                                                                                                                                                                                                                                                                                                                                                                                                                                                                                                                                                  |
| Article Type:                   | Protocol                                                                                                                                                                                                                                                                                                                                                                                                                                                                                                                                                                                                                                                                                                                                                |
| Date Submitted by the Author:   | 08-Sep-2019                                                                                                                                                                                                                                                                                                                                                                                                                                                                                                                                                                                                                                                                                                                                             |
| Complete List of Authors:       | du Fossé, Nadia; Leiden University Medical Center, Gynaecology and Obstetrics<br>van der Hoorn, Marie-Louise; Leiden University Medical Center, Gynaecology and Obstetrics<br>Eikmans, Michael; Leiden University Medical Center, Immunohematology and Blood Transfusion<br>Heidt, Sebastiaan; Leiden University Medical Center, Immunohematology and Blood Transfusion<br>le Cessie, S; Leiden University Medical Center, Clinical Epidemiology ; Leiden University Medical Center, Biomedical Data Sciences<br>Mulders, Annemarie; Erasmus Medical Center, Gynaecology and Obstetrics<br>van Lith, Jan; Leiden University Medical Center, Gynaecology and Obstetrics<br>Lashley, Eileen; Leiden University Medical Center, Gynaecology and Obstetrics |
| <b>Primary Subject Heading</b>: | Obstetrics and gynaecology                                                                                                                                                                                                                                                                                                                                                                                                                                                                                                                                                                                                                                                                                                                              |
| Secondary Subject Heading:      | Epidemiology, Reproductive medicine, Immunology (including allergy), Research methods                                                                                                                                                                                                                                                                                                                                                                                                                                                                                                                                                                                                                                                                   |
| Keywords:                       | REPRODUCTIVE MEDICINE, EPIDEMIOLOGY, IMMUNOLOGY, PERINATOLOGY, Reproductive medicine < GYNAECOLOGY                                                                                                                                                                                                                                                                                                                                                                                                                                                                                                                                                                                                                                                      |
|                                 |                                                                                                                                                                                                                                                                                                                                                                                                                                                                                                                                                                                                                                                                                                                                                         |

SCHOLARONE™  
Manuscripts

1  
2  
3  
4  
5  
6  
7  
8  
9  
10  
11  
12  
13  
14  
15  
16  
17  
18  
19  
20  
21  
22  
23  
24  
25  
26  
27  
28  
29  
30

## Evaluating the role of paternal factors in etiology and prognosis of recurrent pregnancy loss: study protocol for a hospital-based multicentre case-control study and cohort study (REMI III project)

### Authors and affiliations

Nadia A. du Fossé, MD<sup>1</sup>  
Marie-Louise P. van der Hoorn, MD, PhD<sup>1</sup>  
Michael Eikmans, PhD<sup>2</sup>  
Sebastiaan Heidt, PhD<sup>2</sup>  
Saskia le Cessie, PhD<sup>3,4</sup>  
Annemarie G.M.G.J. Mulders, MD, PhD<sup>5</sup>  
Jan M.M. van Lith, MD, PhD<sup>1</sup>  
Eileen E.L.O. Lashley, MD, PhD<sup>1</sup>

<sup>1</sup> Department of Gynaecology and Obstetrics, Leiden University Medical Center, Leiden, the Netherlands

<sup>2</sup> Department of Immunohematology and Blood Transfusion, Leiden University Medical Center, Leiden, the Netherlands

<sup>3</sup> Department of Clinical Epidemiology, Leiden University Medical Center, Leiden, the Netherlands

<sup>4</sup> Department of Biomedical Data Sciences, Leiden University Medical Center, Leiden, the Netherlands

<sup>5</sup> Department of Gynaecology and Obstetrics, Erasmus MC, University Medical Center, Rotterdam, the Netherlands

### Corresponding author

Nadia A. du Fossé  
Leiden University Medical Center, Department of Gynaecology and Obstetrics  
PO Box 9600 (location code: K6-76), 2300 RC Leiden, the Netherlands  
Tel : +31 715262896 Fax : +31 71526 6741  
[n.a.du\\_fosse@lumc.nl](mailto:n.a.du_fosse@lumc.nl)

Word count 299

Word count abstract 3628

41  
42  
43  
44  
45  
46  
47  
48  
49  
50  
51  
52  
53  
54  
55  
56  
57  
58  
59  
60

## ABSTRACT

### Introduction

Recurrent pregnancy loss (RPL) is defined as the spontaneous demise of two or more pregnancies before the fetus reaches viability. Despite investigation of multiple known maternal risk factors, in more than 50% of couples this condition remains unexplained. Studies focusing on paternal factors in RPL are scarce and, therefore, paternal evaluation in RPL is currently very limited. However, regarding single miscarriage, there are multiple publications suggesting a contributive role of paternal factors. In this project we aim to identify paternal factors associated with RPL and to improve couple-specific prediction of future pregnancy outcomes by developing a prediction model containing both maternal and paternal factors.

### Methods and analysis

In a case-control design the relation between unexplained RPL and paternal age, lifestyle factors, sperm DNA damage and immunomodulatory factors in peripheral blood and semen will be studied. Prospectively, 135 couples with naturally conceived unexplained RPL (cases) and 135 fertile couples without a history of pregnancy loss (controls) will be included, with collection of paternal blood and semen samples and documentation of clinical and lifestyle characteristics. In addition, 600 couples from both groups will be included retrospectively. To adjust for confounders, multivariate logistic regression will be used. The predictive value of paternal and maternal factors will be studied in the total RPL cohort consisting of approximately 735 couples. The primary outcome of the cohort study is live birth within five years after initial visit of the clinic. Secondary outcomes are ongoing pregnancy, time interval until next pregnancy and pregnancy complications.

### Ethics and dissemination

This project is approved by the Medical Research Ethics Committee of the Leiden University Medical Center. No risks or burden are expected from the study. The findings of this study will be disseminated via peer-reviewed publications and presentations at international conferences.

### Trial registration number

Netherlands Trial Register NL7762

### Keywords

REPRODUCTIVE MEDICINE, EPIDEMIOLOGY, IMMUNOLOGY, PERINATOLOGY, GYNAECOLOGY >  
Reproductive medicine

## ARTICLE SUMMARY

### Strengths and limitations of this study

- First large multicentre prospective study to investigate the contribution of both paternal lifestyle and biological factors to the development of RPL.
- Extensive cohort of RPL couples that will provide sufficient data to develop a multivariable prediction model for future pregnancy outcomes.
- Generalizability of the outcomes is increased by the collaboration between two Dutch tertiary centres in different regions that serve a diverse patient population.
- Control of bias by adjustment for important maternal confounders, to investigate the independent effect of paternal factors on RPL.

- Observational studies on lifestyle factors are prone to response and recall bias; a potential limitation of this study.

## INTRODUCTION

Spontaneous pregnancy loss is the most common complication in human pregnancy, defined as the loss of conception before the fetus reaches viability (<24 weeks of gestation) and occurs in 10-15% of clinically recognized pregnancies.[1, 2] Pregnancy loss is also often referred to as miscarriage, however this term is recommended to be used for confirmed intrauterine pregnancy losses only. [3] Recurrent pregnancy loss (RPL) is defined as two or more losses in one couple.[1] This condition affects approximately 1-3% of all couples of reproductive age.[4, 5]

RPL is a highly heterogeneous condition. Among the multifaceted risk factors are maternal acquired thrombophilia (antiphospholipid syndrome), structural uterine abnormalities, thyroid autoimmunity and parental balanced chromosomal translocations.[6-12] Maternal age is a strong risk factor for pregnancy loss, mainly based on the increased prevalence of the fetal aneuploid abnormalities with advancing age.[13] Maternal lifestyle factors such as smoking, alcohol and caffeine consumption and adiposity are also associated with RPL.[14-19]

Despite extensive investigations, a potential underlying condition cannot be identified in 50-70% of couples that present with RPL.[20, 21] Limited understanding of underlying pathophysiologic mechanisms means that options for effective interventions are lacking. Currently, no evidence-based therapeutic options are available for couples with unexplained RPL. Clinical management is either empirical or primarily focused on providing supportive care, which has been shown to have a beneficial effect.[22] Part of this supportive care is counseling on the prognosis and success rate of subsequent pregnancies in couples with RPL. Lund et al. evaluated the prognosis of 987 women with RPL and found that 67% achieved a live birth within 5 years after first consultation.[23] They showed that the chance of at least one subsequent live birth decreased significantly with increasing maternal age and cumulative number of preceding miscarriages. Other studies reported live birth rates ranging from 57-95%.[24-26] This large variation might be explained by the use of different definitions for RPL (2 vs. 3 losses, consecutive vs. non-consecutive, primary vs. secondary), by the degree of monitoring of the women and by in- or exclusion of biochemical pregnancies in the definition of RPL.[23] Nevertheless, these results demonstrate that although unidentified factors increasing the risk for pregnancy loss may exist, they do not necessarily prevent the development of a successful pregnancy. An essential part of the management of couples with RPL is to give trustworthy advice on the prognosis for a next pregnancy. However, the main limitation in current prognostic studies on unexplained RPL is the lack of adjustment for relevant risk factors, disabling the possibility of individual risk estimation.[23, 27]

The investigation of paternal contribution to RPL is currently limited to exploring the male karyotype. When considering counseling at an individual level, paternal factors may be included to establish a couple specified prognosis. Since the oocyte and the spermatozoon contribute equally to the genome of the embryo, it is biologically plausible to think that part of the idiopathic RPL cases could be explained by paternal factors. Some studies have evaluated the effect of paternal risk factors such as age, smoking and somatic health factors on the development of miscarriages, though these studies are mostly restricted to single miscarriage or to couples undergoing assisted reproductive techniques.[28-30] Following the absence of a consistent association between conventional semen parameters and RPL[31-38], the majority of recent studies addressing paternal factors and pregnancy losses focused on genetic defects, with sperm DNA fragmentation showing the most promising results. Both Robinson[39] and Zhao[40] showed in a meta-analysis that a high level of sperm DNA damage is associated with an increased miscarriage rate after in vitro

1  
2  
3 fertilization/intracytoplasmic sperm injection (IVF/ICSI) treatment. Two other recent meta-analyses  
4 found an increased mean difference in sperm DNA fragmentation of 12% in male partners of women  
5 with RPL compared to men whose partners had successful pregnancies.[41, 42] However,  
6 prospective studies in RPL couples evaluating the predictive value of sperm DNA fragmentation on  
7 future pregnancy outcomes are lacking.  
8

9  
10 In addition, imbalances in seminal immunomodulatory factors may contribute to the development  
11 of RPL. During pregnancy the maternal immune system has to tolerate the presence of semi-  
12 allogeneic cells in maternal tissue. Seminal fluid contains various signalling molecules that are  
13 thought to induce lymphocyte proliferation, affect natural killer cell activity and modify cytokine  
14 release from antigen presenting cells, resulting in tolerance towards paternal allo-antigens.[43-45]  
15 An optimal balance of pro-inflammatory and immunomodulatory factors seems to be necessary for  
16 the induction of immunologic tolerance and the process of implantation and placentation.[46]  
17 Increased plasma levels of IL-18 and IL-8 and decreased levels of IL-11 were found to be negatively  
18 correlated to fertilization and implantation.[47, 48] In subfertile couples with normospermia,  
19 including a small subgroup with a history of RPL, decreased concentrations of IL-1 $\beta$  and increased  
20 IFN- $\gamma$  were present in the seminal plasma.[49] The same study also suggests a correlation between  
21 levels of pro-inflammatory and anti-inflammatory cytokines in paternal peripheral blood and  
22 reproductive outcome. In case of such correlations, cytokine micropatterns in blood serum could  
23 serve as a proxy for those in the seminal plasma and could potentially be suitable as easily available  
24 prognostic markers in clinical practice. However, larger prospective studies are required to assess  
25 this.  
26  
27

28  
29 In this study we hypothesize that unexplained RPL is an issue stemming from both the female and  
30 the male. Our overall aims are to identify paternal factors that are associated with the development  
31 of this condition and to assess the predictive value of these factors for future reproductive outcomes  
32 in couples with RPL, in addition to maternal factors.  
33  
34  
35  
36

## 37 **STUDY OBJECTIVES**

### 38 **Primary objectives**

39 To identify paternal factors that are associated with unexplained RPL.

40 Paternal factors that will be assessed are: age, smoking, alcohol intake, recreational drugs intake,  
41 caffeine intake, body mass index (BMI), level of sperm DNA fragmentation and immunomodulatory  
42 factors in seminal plasma and paternal peripheral blood.  
43  
44

45 To assess the correlation between level of sperm DNA fragmentation and immunomodulatory  
46 factors in seminal plasma and paternal peripheral blood.  
47  
48

### 49 **Secondary objectives**

50 To assess the prognostic effect of paternal factors on reproductive outcomes in couples with  
51 unexplained RPL.  
52  
53

54 To develop a prediction model containing both maternal and paternal factors to predict the chance  
55 of a successful pregnancy for couples with unexplained RPL.  
56  
57  
58  
59  
60

## METHODS AND ANALYSIS

### Study design

The primary objectives are focused on etiology and will be addressed in a case-control study. In this case-control study paternal factors are compared between couples with RPL and control couples. The expected duration of the case-control study is one year.

The secondary objectives will be addressed in a retrospective and prospective cohort study of couples with RPL. For all couples participating in the cohort study we aim to complete a follow-up on pregnancy outcomes of five years after first consultation.

A schematic overview of the study design is shown in Figure 1.

### Eligibility criteria

Inclusion criteria for RPL couples are:

- Unexplained RPL  
According to the ESHRE Recurrent Pregnancy Loss Guideline[1] defined as the loss of  $\geq 2$  pregnancies in the current relationship, without any of the following known risk factors: parental chromosomal abnormalities, uterine abnormalities, acquired thrombophilia, and thyroid auto-immunity. The definition includes all pregnancy losses before 24<sup>th</sup> week of gestation verified by ultrasonography or uterine curettage and histology and also non-visualized pregnancies (including biochemical pregnancy loss and/or resolved and treated pregnancies of unknown location) verified by positive urine or serum hCG. If identified as such, ectopic and molar pregnancies are not included. Pregnancy losses do not need to be consecutive.

Exclusion criteria for RPL couples are:

- Known risk factors for RPL as defined above;
- Mental or legal incapability of either the male or female;
- Pregnancy after assisted reproductive techniques (ART);
- Pregnancy after oocyte, embryo or spermatozoa donation;
- Loss of  $< 2$  pregnancies in the current relationship.

Inclusion criteria for control couples are:

- Proven fertility (i.e. pregnant at the time of inclusion or previously experienced pregnancy in the same relationship)

Exclusion criteria for control couples are:

- Previous spontaneous pregnancy loss;
- One of the following conditions: parental chromosomal abnormalities, uterine abnormalities, acquired thrombophilia and thyroid autoimmunity (this will not be investigated, however, couples are excluded when it is known);
- Mental or legal incapability of either the male or female;
- Pregnancy after ART;
- Pregnancy after oocyte, embryo or spermatozoa donation.

### Study population and recruitment

Couples with RPL that visit the recurrent pregnancy loss outpatient clinic of Leiden University Medical Center (LUMC) or Early Pregnancy Unit (EPU) of Erasmus MC University Medical Center (Erasmus MC) will be assessed for eligibility. LUMC is the coordinating centre. Couples with RPL will



be invited to participate at their intake visit (after they have been referred by their general practitioner or a referring hospital). After diagnostic investigations on known risk factors of RPL are completed, couples with unexplained RPL will be selected for inclusion. In addition, couples that visited the participating clinics in the period 2012-2019 will be included in retrospect. Couples with RPL will participate in both the case-control study and the cohort study.

Eligible couples visiting the antenatal outpatient clinic of LUMC during their pregnancy will be invited to participate in the control group. Control couples will also be included in retrospect.

Study recruitment in the coordinating centre started in June 2019. Recruitment at Erasmus MC is expected to start in September 2019. All couples will receive written information about the study together with the informed consent form, which includes a request to obtain permission for gathering data from medical records and storage of biomaterial for additional analyses related to this study. Participants are informed that study participation is voluntary and that they are free to withdraw at any time without any consequences for subsequent care. In case of participation, the informed consent form should be signed prior to inclusion in the study.

## Study procedures

### *Collection of clinical characteristics*

Data about obstetric and general medical history and lifestyle factors of all participating couples will be documented (Table 1).

| <i>Parameters</i>                                                                 |                                                                                                                                                                                                                                                                                                                                                                                                                                                                                                                                                                                                                                  |
|-----------------------------------------------------------------------------------|----------------------------------------------------------------------------------------------------------------------------------------------------------------------------------------------------------------------------------------------------------------------------------------------------------------------------------------------------------------------------------------------------------------------------------------------------------------------------------------------------------------------------------------------------------------------------------------------------------------------------------|
| <b><i>Maternal characteristics</i></b>                                            | Date of birth, zip code, ethnicity, level of education, profession, body weight, height, general medical history, use of medication, family history, detailed obstetric history (parity, number of spontaneous pregnancy losses, ectopic pregnancies or induced abortions, modes of conception of previous births, modes of delivery of previous births, gestational age at previous births, complications during previous pregnancies and deliveries, birth weight, gender and Apgar score of children of previous births), lifestyle characteristics (smoking, alcohol, drugs and caffeine intake, physical exercise pattern). |
| <b><i>Paternal characteristics</i></b>                                            | Date of birth, zip code, ethnicity, level of education, profession, body weight, height, general medical history, use of medication, family history, lifestyle characteristics (smoking, alcohol, drugs and caffeine intake, physical exercise pattern).                                                                                                                                                                                                                                                                                                                                                                         |
| <b><i>Results of (previous) investigations into known risk factors of RPL</i></b> | Presence of antiphospholipid syndrome (anticardiolipin IgG and IgM, B2 glycoprotein I antibodies IgG and IgM, and lupus anticoagulans), parental chromosomal abnormalities, presence of thyroid antibodies, presence of uterine anomalies.                                                                                                                                                                                                                                                                                                                                                                                       |

**Table 1. Collection of data**

These data will be collected during consultations (in a semi-standardized way using a template) and from medical records. Additional required data will be acquired via digital surveys that will be sent to participating couples. Data entry and generation of digital surveys will be performed using Castor EDC.[50]

Couples with RPL participating in the cohort study will be in follow-up for a total time of five years after initial consultation. These couples will receive a digital survey once a year. This survey contains questions about outcomes of new pregnancies if applicable and changes in medical history and lifestyle in the past year. When couples with RPL are still in regular clinical follow-up, data will be collected during regular consultations and it will not be necessary to send a digital survey. Retrospectively included couples from whom (part of) the follow-up period is missing in their medical records, will receive a survey to ask for pregnancy outcomes in the missing time period.

Clinical characteristics of couples participating in the control group will be collected at one time point (during consultation at the antenatal clinic), directly followed by a digital survey containing questions about lifestyle related to the period prior to the index pregnancy. There is no follow-up of control couples.

### *Collection and analysis of samples*

Male partners of participating couples will be asked for a peripheral blood sample and sperm sample acquired through masturbation. Samples will be collected from all prospectively included men. This applies to both cases and controls. From all retrospectively included couples only clinical data will be documented

All samples will be processed and analyzed in the laboratory of Reproductive Immunology at LUMC. Samples will be collected once. Samples from other participating centres will be sent to LUMC for storage and analysis.

Semen samples will be stored in -20°C until time of analysis. Sperm DNA fragmentation will be detected by terminal deoxynucleotidyltransferase dUTP nick end labeling (TUNEL) assay (APO-DIRECT™ Kit, BD Biosciences) following the manufacturer's instructions. The level (%) of sperm DNA fragmentation will be determined by flow cytometric analysis.

The level of immunomodulatory factors in seminal plasma and peripheral blood will be assessed by Bio-Plex Luminex™ system assay (Bio-Rad Laboratories) following the manufacturer's instructions. Samples will be analysed using a Bio-Plex™ Array Reader with Bio-Plex software. Through this assay quantification of cytokine levels including TNF- $\alpha$ , IFN- $\gamma$ , TGF- $\beta$ 1, IL-1 $\beta$ , IL-8, IL-10, IL-11, IL-18, sHLA-G and PGE2 will be performed. These cytokines were selected because previous small studies suggested correlations between concentrations in seminal plasma and/or paternal peripheral blood and reproductive outcome. [47-49, 51]

### **Control of bias**

Since the design of this study is observational, there is need to control and adjust for confounding factors. For example, maternal age is an important confounder for the effect of paternal age on RPL. To control for confounders, stratification and regression models will be used. Selection bias is minimized by a clear definition of the study population. In addition, the control couples are selected independently of their exposure and they represent the source population that generates the cases. Finally, information bias is limited as much as possible by collecting information similarly from the cases and controls.

### **Sample size calculation**

#### *Case-control study*

Since sperm DNA fragmentation could be seen as a proxy for advanced age and also for the presence of smoking, obesity and excessive exercise, this factor was used for sample size calculations. Zhao et

1  
2  
3 al.[40] evaluated the association between sperm DNA fragmentation and miscarriages after IVF/ICSI  
4 treatment in 2756 couples and they found a combined odds ratio of 2.28 (95% CI 1.55-3.35) for  
5 miscarriage in patients with high sperm DNA fragmentation The rate of high sperm DNA  
6 fragmentation was significantly higher in the group with miscarriage (34%) compared to the group  
7 with live births (19%). To detect this difference, using  $\alpha = 0.05$  and power = 80%, the sample size  
8 would be 135 in the RPL group and 135 in the control group. Also the recent meta-analyses of Tan et  
9 al.[41] and McQueen et al.[42] have been taken into consideration for sample size calculation. They  
10 evaluated the mean difference in % sperm DNA fragmentation between RPL patients and fertile  
11 controls. However, based on these mean differences (both of approximately 11%), the sample size  
12 would be very small (<10 per arm) and therefore not appropriate for this project, since we are not  
13 solely interested in sperm DNA fragmentation but also in other lifestyle and demographic factors.  
14  
15

### 16 *Cohort-study*

17  
18 No straightforward accepted methods exist to estimate the required number of subjects to develop  
19 a multivariable prediction model. Ideally, prognostic studies include several hundreds of patients  
20 who develop the outcome event.[52] Various studies have suggested that for each candidate  
21 predictor studied, at least 10 events are required.[53, 54] Currently, female age and number of  
22 previous pregnancy losses are the only known factors consistently shown to impact prognosis for  
23 future pregnancy outcomes.[1] In addition to these factors, we intend to examine paternal factors  
24 for their predictive capacity. Assuming that at least two paternal factors will be included in the  
25 model, like age and BMI (and also maternal BMI), with four age categories (<30, 30-35, 35-40, >40  
26 years), four categories for preceding pregnancy losses (2, 3, 4,  $\geq 5$ ) and four BMI categories (<18, 18-  
27 25, 25-30,  $>30 \text{ kg/m}^2$ ), a minimum of  $20 \times 10 = 200$  patients with RPL and live birth in subsequent  
28 pregnancy are necessary. We estimate that the total RPL cohort will eventually consist of  
29 approximately 735 couples (with retrospective and prospective inclusions together, shown in Figure  
30 1) and we expect 70% of them to have a live birth within five years after initial consultation. Based  
31 on these numbers, it is feasible to develop a multivariable model to predict the chances for ongoing  
32 pregnancy and live birth within five years. We will include patients who visited the clinics between  
33 2012-2019 and also the couples (cases) of the case-control study.  
34  
35  
36

### 37 **Study outcomes**

38 In the case-control study the following exposures will be studied:

- 39 • Smoking: documented as average number of cigarettes per day. Also data on former  
40 smoking behavior will be documented;
- 41 • Alcohol consumption: documented as average number of units per week;
- 42 • Recreational drug consumption: specified by type of drug, quantity and frequency;
- 43 • Caffeine intake: documented as average number of caffeinated drinks per day;
- 44 • Physical exercise pattern; documented as moderate to intensive physical exercise in  
45 days per week and minutes per day.

46 In the cohort study the following outcomes will be studied:

- 47 • Live birth within five years after initial consultation (for this outcome we intend to  
48 develop a prediction model);
- 49 • Ongoing pregnancy (>24 weeks);
- 50 • Time interval until next pregnancy;
- 51 • Pregnancy complications including fetal growth restriction, preterm birth, pregnancy  
52 induced hypertension (PIH), preeclampsia, Hemolysis Elevated Liver enzymes and Low  
53 Platelets (HELLP) syndrome and gestational diabetes mellitus.

## Statistical analysis plan

### *Case-control study*

For the case-control study, proportions will be calculated for the dichotomous and categorial exposures with 95% confidence intervals. Comparison between the cases and controls is performed by a Chi square test. Mean differences with 95% confidence intervals are calculated to compare continuous variables between the groups. To correct for confounders (including maternal factors), stratified analyses and multivariate logistic regression including paternal and maternal variables that are highly correlated will be performed.

### *Cohort study*

To indicate a relation between live birth and paternal (and maternal) factors as described above, first univariate logistic regression will be used. To select the most prognostic set of variables logistic regression with shrinkage methods such as lasso will be used. Time to pregnancy is estimated using the Kaplan Meier method. Only in the subgroup of prospectively included RPL couples (with collection of samples) blood and sperm investigations will be included in the analyses.

To cope with analysis of missing values, multiple imputation will be performed. Statistical analysis will be performed using SPSS Statistics 25 (IBM SPSS Software) and/or R version 3.6.0. For all tests a two sided  $p < 0.05$  or 95% confidence interval not including the null value is considered significant.

## PATIENT AND PUBLIC INVOLVEMENT

During the development of the study protocol the Dutch association for patients with fertility problems (Freya) was consulted. Results will be presented during their thematic meetings to inform patients about study progress. Social media will be used to highlight new publications and conference presentations.

## ETHICS AND DISSEMINATION

This study will be conducted according to the principles of the Declaration of Helsinki.[55] Ethics approval for this study was obtained at the Medical Research Ethics Committee of the Leiden University Medical Center. No risks or burden are expected from the study. No additional hospital visits are required.

Eligible couples obtain written information about the study objectives and procedures and they will have sufficient time to decide on participating. All clinical data and data derived from surveys will be saved in the Castor EDC REMI III database. No data directly traceable to patients will be included in this database. Every couple will be assigned a unique code. This code will also be used to associate clinical data with corresponding blood and semen samples.

The findings of this study will be disseminated via peer-reviewed publications and presentations at international conferences.

## DISCUSSION

RPL is often accompanied by psychological morbidities such as depression and anxiety, making it a very distressing and costly condition.[56] In current practice RPL is mostly considered an issue derived exclusively from female causes. However, it is questionable whether this female-centred approach is correct, especially considering the substantial proportion of RPL cases that remains

1  
2  
3 unexplained. In November 2017 the European Society of Human Reproduction and Embryology  
4 (ESHRE) developed a new guideline for the management of RPL, to supply healthcare providers with  
5 the best available evidence for investigation and treatment of RPL. Future research on the paternal  
6 contribution in RPL, such as the impact of paternal lifestyle factors and sperm DNA damage, was  
7 recommended by the Guideline committee.[1]  
8  
9

10 In this project we hypothesize that besides maternal factors, paternal factors are associated with the  
11 development of RPL. Understanding the role of these factors contributing to the pathological  
12 mechanisms of RPL may provide new diagnostic tools and treatment options. To the best of our  
13 knowledge, this project includes the first large prospective cohort study evaluating the contribution  
14 of multiple paternal lifestyle and biological factors to unexplained RPL.  
15

16 Limitations of all research on lifestyle factors using self-reported data are the phenomena of recall  
17 and response bias. Individuals might report biased estimates of self-assessed behaviour for different  
18 reasons, including misunderstanding or social-desirability. Although these types of bias will always  
19 be present to some extent, we try to minimize this by using standardized and well-structured  
20 surveys, by avoiding long recall periods as much as possible and by choosing an appropriate and  
21 well-defined control group.  
22  
23

24 Ultimately, we aim to develop a couple-specific model including both maternal and paternal factors  
25 to predict future reproductive outcomes in couples with unexplained RPL. Although not an  
26 intervention as such, counseling couples confronted with RPL about their individual prognosis is an  
27 essential part of the management of these couples and allows them to decide for or against future  
28 pregnancy attempts. Moreover, this study might also provide new starting points for future  
29 treatment options with regard to lifestyle interventions.  
30  
31  
32  
33  
34  
35  
36  
37  
38  
39  
40  
41  
42  
43  
44  
45  
46  
47  
48  
49  
50  
51  
52  
53  
54  
55  
56  
57  
58  
59  
60

## FULL REFERENCES

1. ESHRE EPGDG. Recurrent Pregnancy Loss. *Guideline of the European Society of Human Reproduction and Embryology* 2017.
2. Nybo Andersen AM, Wohlfahrt J, Christens P, et al. Maternal age and fetal loss: population based register linkage study. *Bmj* 2000;320:1708-12.
3. Kolte AM, on behalf of the ESHRE Special Interest Group EP, Bernardi LA, et al. Terminology for pregnancy loss prior to viability: a consensus statement from the ESHRE early pregnancy special interest group. *Human Reproduction* 2014;30:495-8.
4. Rai R, Regan L. Recurrent miscarriage. *Lancet* 2006;368:601-11.
5. Jauniaux E, Farquharson RG, Christiansen OB, et al. Evidence-based guidelines for the investigation and medical treatment of recurrent miscarriage. *Hum Reprod* 2006;21:2216-22.
6. Miyakis S, Lockshin MD, Atsumi T, et al. International consensus statement on an update of the classification criteria for definite antiphospholipid syndrome (APS). *J Thromb Haemost* 2006;4:295-306.
7. van den Boogaard E, Cohn DM, Korevaar JC, et al. Number and sequence of preceding miscarriages and maternal age for the prediction of antiphospholipid syndrome in women with recurrent miscarriage. *Fertil Steril* 2013;99:188-92.
8. Woelfer B, Salim R, Banerjee S, et al. Reproductive outcomes in women with congenital uterine anomalies detected by three-dimensional ultrasound screening. *Obstet Gynecol* 2001;98:1099-103.
9. Salim R, Woelfer B, Backos M, et al. Reproducibility of three-dimensional ultrasound diagnosis of congenital uterine anomalies. *Ultrasound Obstet Gynecol* 2003;21:578-82.
10. Lata K, Dutta P, Sridhar S, et al. Thyroid autoimmunity and obstetric outcomes in women with recurrent miscarriage: a case-control study. 2013;2:118.
11. Hook EB, Healy NP, Willey AM. How much difference does chromosome banding make? Adjustments in prevalence and mutation rates of human structural cytogenetic abnormalities. *Ann Hum Genet* 1989;53:237-42.
12. De Braekeleer M, Dao TN. Cytogenetic studies in couples experiencing repeated pregnancy losses. *Hum Reprod* 1990;5:519-28.
13. Goddijn M, Leschot NJ. Genetic aspects of miscarriage. *Baillieres Best Pract Res Clin Obstet Gynaecol* 2000;14:855-65.
14. Gardella JR, Hill JA, 3rd. Environmental toxins associated with recurrent pregnancy loss. *Semin Reprod Med* 2000;18:407-24.
15. Christiansen OB, Nybo Andersen AM, Bosch E, et al. Evidence-based investigations and treatments of recurrent pregnancy loss. *Fertil Steril* 2005;83:821-39.
16. George L, Granath F, Johansson AL, et al. Risks of repeated miscarriage. *Paediatr Perinat Epidemiol* 2006;20:119-26.
17. Lashen H, Fear K, Sturdee DW. Obesity is associated with increased risk of first trimester and recurrent miscarriage: matched case-control study. *Hum Reprod* 2004;19:1644-6.
18. Cnattingius S, Signorello LB, Anneren G, et al. Caffeine intake and the risk of first-trimester spontaneous abortion. *N Engl J Med* 2000;343:1839-45.
19. George L, Granath F, Johansson AL, et al. Environmental tobacco smoke and risk of spontaneous abortion. *Epidemiology* 2006;17:500-5.
20. Stephenson MD. Frequency of factors associated with habitual abortion in 197 couples. *Fertil Steril* 1996;66:24-9.
21. Jaslow CR, Carney JL, Kutteh WH. Diagnostic factors identified in 1020 women with two versus three or more recurrent pregnancy losses. *Fertil Steril* 2010;93:1234-43.
22. Liddell HS, Pattison NS, Zanderigo A. Recurrent miscarriage--outcome after supportive care in early pregnancy. *Aust N Z J Obstet Gynaecol* 1991;31:320-2.
23. Lund M, Kamper-Jorgensen M, Nielsen HS, et al. Prognosis for live birth in women with recurrent miscarriage: what is the best measure of success? *Obstet Gynecol* 2012;119:37-43.



24. Kaandorp SP, Goddijn M, van der Post JA, et al. Aspirin plus heparin or aspirin alone in women with recurrent miscarriage. *N Engl J Med* 2010;362:1586-96.
25. Badawy AM, Khiary M, Sherif LS, et al. Low-molecular weight heparin in patients with recurrent early miscarriages of unknown aetiology. *J Obstet Gynaecol* 2008;28:280-4.
26. Fawzy M, Shokeir T, El-Tatongy M, et al. Treatment options and pregnancy outcome in women with idiopathic recurrent miscarriage: a randomized placebo-controlled study. *Arch Gynecol Obstet* 2008;278:33-8.
27. Sugiura-Ogasawara M, Ozaki Y, Kitaori T, et al. Live birth rate according to maternal age and previous number of recurrent miscarriages. *Am J Reprod Immunol* 2009;62:314-9.
28. de la Rochebrochard E, Thonneau P. Paternal age and maternal age are risk factors for miscarriage; results of a multicentre European study. *Hum Reprod* 2002;17:1649-56.
29. Venners SA, Wang X, Chen C, et al. Paternal smoking and pregnancy loss: a prospective study using a biomarker of pregnancy. *Am J Epidemiol* 2004;159:993-1001.
30. Colaci DS, Afeiche M, Gaskins AJ, et al. Men's body mass index in relation to embryo quality and clinical outcomes in couples undergoing in vitro fertilization. *Fertil Steril* 2012;98:1193-9.e1.
31. Sbracia S, Cozza G, Grasso JA, et al. Semen parameters and sperm morphology in men in unexplained recurrent spontaneous abortion, before and during a 3 year follow-up period. *Hum Reprod* 1996;11:117-20.
32. Gopalkrishnan K, Padwal V, Meherji PK, et al. Poor quality of sperm as it affects repeated early pregnancy loss. *Arch Androl* 2000;45:111-7.
33. Bhattacharya SM. Association of various sperm parameters with unexplained repeated early pregnancy loss--which is most important? *Int Urol Nephrol* 2008;40:391-5.
34. Brahem S, Mehdi M, Landolsi H, et al. Semen parameters and sperm DNA fragmentation as causes of recurrent pregnancy loss. *Urology* 2011;78:792-6.
35. Imam SN, Shamsi MB, Kumar K, et al. Idiopathic recurrent pregnancy loss: role of paternal factors; a pilot study. *J Reprod Infertil* 2011;12:267-76.
36. Talebi AR, Vahidi S, Aflatoonian A, et al. Cytochemical evaluation of sperm chromatin and DNA integrity in couples with unexplained recurrent spontaneous abortions. *Andrologia* 2012;44 Suppl 1:462-70.
37. Khadem N, Poorhoseyni A, Jalali M, et al. Sperm DNA fragmentation in couples with unexplained recurrent spontaneous abortions. *Andrologia* 2014;46:126-30.
38. Zhang L, Wang L, Zhang X, et al. Sperm chromatin integrity may predict future fertility for unexplained recurrent spontaneous abortion patients. *Int J Androl* 2012;35:752-7.
39. Robinson L, Gallos ID, Conner SJ, et al. The effect of sperm DNA fragmentation on miscarriage rates: a systematic review and meta-analysis. *Hum Reprod* 2012;27:2908-17.
40. Zhao J, Zhang Q, Wang Y, et al. Whether sperm deoxyribonucleic acid fragmentation has an effect on pregnancy and miscarriage after in vitro fertilization/intracytoplasmic sperm injection: a systematic review and meta-analysis. *Fertil Steril* 2014;102:998-1005.e8.
41. Tan J, Taskin O, Albert A, et al. Association between sperm DNA fragmentation and idiopathic recurrent pregnancy loss: a systematic review and meta-analysis. *Reprod Biomed Online* 2018.
42. McQueen DB, Zhang J, Robins JC. Sperm DNA fragmentation and recurrent pregnancy loss: a systematic review and meta-analysis. *Fertil Steril* 2019.
43. Moldenhauer LM, Diener KR, Thring DM, et al. Cross-presentation of male seminal fluid antigens elicits T cell activation to initiate the female immune response to pregnancy. *J Immunol* 2009;182:8080-93.
44. Robertson SA. Seminal plasma and male factor signalling in the female reproductive tract. *Cell Tissue Res* 2005;322:43-52.
45. Meuleman T, Snaterse G, van Beelen E, et al. The immunomodulating effect of seminal plasma on T cells. *J Reprod Immunol* 2015;110:109-16.

- 1  
2  
3 46. Nederlof I, Meuleman T, van der Hoorn MLP, et al. The seed to success: The role of seminal  
4 plasma in pregnancy. *J Reprod Immunol* 2017;123:24-8.
- 5 47. Nikolaeva MA, Babayan AA, Stepanova EO, et al. The relationship of seminal transforming  
6 growth factor-beta1 and interleukin-18 with reproductive success in women exposed to seminal  
7 plasma during IVF/ICSI treatment. *J Reprod Immunol* 2016;117:45-51.
- 8 48. Seshadri S, Bates M, Vince G, et al. Cytokine expression in the seminal plasma and its effects  
9 on fertilisation rates in an IVF cycle. *Andrologia* 2011;43:378-86.
- 10 49. Havrylyuk A, Chopyak V, Boyko Y, et al. Cytokines in the blood and semen of infertile  
11 patients. *Cent Eur J Immunol* 2015;40:337-44.
- 12 50. Ciwit BV. Castor Electronic Data Capture [Internet]. 2018.
- 13 51. Larsen MH, Bzorek M, Pass MB, et al. Human leukocyte antigen-G in the male reproductive  
14 system and in seminal plasma. *Mol Hum Reprod* 2011;17:727-38.
- 15 52. Moons KG, Royston P, Vergouwe Y, et al. Prognosis and prognostic research: what, why, and  
16 how? *Bmj* 2009;338:b375.
- 17 53. Laupacis A, Sekar N, Stiell IG. Clinical prediction rules. A review and suggested modifications  
18 of methodological standards. *Jama* 1997;277:488-94.
- 19 54. Harrell FE, Jr., Lee KL, Mark DB. Multivariable prognostic models: issues in developing  
20 models, evaluating assumptions and adequacy, and measuring and reducing errors. *Stat Med*  
21 1996;15:361-87.
- 22 55. World Medical Association Declaration of Helsinki: ethical principles for medical research  
23 involving human subjects. *Jama* 2013;310:2191-4.
- 24 56. Serrano F, Lima ML. Recurrent miscarriage: psychological and relational consequences for  
25 couples. *Psychol Psychother* 2006;79:585-94.
- 26  
27  
28  
29  
30  
31  
32  
33  
34  
35  
36  
37  
38  
39  
40  
41  
42  
43  
44  
45  
46  
47  
48  
49  
50  
51  
52  
53  
54  
55  
56  
57  
58  
59  
60



## AUTHOR'S CONTRIBUTIONS

EL and MLvdH drafted the protocol and then NdF wrote the protocol in accordance with the co-authors' contributions. ME and SH complemented on the immunological questions in this protocol and SIC, JvL and AM improved the methodological aspects. All authors contributed to the writing and reviewing of this article and gave final approval of the version to be published.

## COMPETING INTERESTS STATEMENT

None declared.

## FUNDING STATEMENT

This project has funding from the Leiden University research profile 'Innovation in Health Strategy and Quality of Care'.

## LICENSE STATEMENT

I, the Submitting Author has the right to grant and does grant on behalf of all authors of the Work (as defined in the below author licence), an exclusive licence and/or a non-exclusive licence for contributions from authors who are: i) UK Crown employees; ii) where BMJ has agreed a CC-BY licence shall apply, and/or iii) in accordance with the terms applicable for US Federal Government officers or employees acting as part of their official duties; on a worldwide, perpetual, irrevocable, royalty-free basis to BMJ Publishing Group Ltd ("BMJ") its licensees and where the relevant Journal is co-owned by BMJ to the co-owners of the Journal, to publish the Work in BMJ Open and any other BMJ products and to exploit all rights, as set out in our license statement.

## TABLE AND FIGURE LEGENDS

### Figure 1. Schematic diagram of study design

For the case-control study the target for inclusion is 735 couples in each arm. Of these 735 couples, 600 will be included retrospectively (2012-2018) and 135 will be included prospectively (2019-2020). Semen and blood will be collected from prospectively included men only.

Couples with RPL (cases) are also part of a cohort study. We aim to complete a five year follow-up of these couples, starting from their individual point of inclusion. Control couples will not be in follow-up.

For peer review only

1  
2  
3  
4  
5  
6  
7  
8  
9  
10  
11  
12  
13  
14  
15  
16  
17  
18  
19  
20  
21  
22  
23  
24  
25  
26  
27  
28  
29  
30  
31  
32  
33  
34  
35  
36  
37  
38  
39  
40  
41  
42  
43  
44  
45  
46  
47  
48  
49  
50  
51  
52  
53  
54  
55  
56  
57  
58  
59  
60



Figure 1. Schematic diagram of study design  
 For the case-control study the target for inclusion is 735 couples in each arm. Of these 735 couples, 600 will be included retrospectively (2012-2018) and 135 will be included prospectively (2019-2020). Semen and blood will be collected from prospectively included men only.  
 Couples with RPL (cases) are also part of a cohort study. We aim to complete a five year follow-up of these couples, starting from their individual point of inclusion. Control couples will not be in follow-up.

166x96mm (300 x 300 DPI)
